# Supplementary material for: Molecular recognition of formylpeptides and diverse agonists by the formylpeptide receptors FPR1 and FPR2
Source: PubMed Central journal article supplement (PMC8881469; doi:10.1038/s41467-022-28586-0), 2022-02-25
Supplement: 41467_2022_28586_MOESM3_ESM.pdf [file 41467_2022_28586_MOESM3_ESM.pdf]

Corresponding author(s): Cheng Zhang, Eric Xu.

Last updated by author(s): Nov 6, 2021

## Reporting Summary

Nature Portfolio wishes to improve the reproducibility of the work that we publish. This form provides structure for consistency and transparency in reporting. For further information on Nature Portfolio policies, see our [Editorial Policies](#) and the [Editorial Policy Checklist](#).

### Statistics

For all statistical analyses, confirm that the following items are present in the figure legend, table legend, main text, or Methods section.

n/a Confirmed

- |                                     |                                     |                                                                                                                                                                                                                                                            |
|-------------------------------------|-------------------------------------|------------------------------------------------------------------------------------------------------------------------------------------------------------------------------------------------------------------------------------------------------------|
| <input type="checkbox"/>            | <input checked="" type="checkbox"/> | The exact sample size ( $n$ ) for each experimental group/condition, given as a discrete number and unit of measurement                                                                                                                                    |
| <input type="checkbox"/>            | <input checked="" type="checkbox"/> | A statement on whether measurements were taken from distinct samples or whether the same sample was measured repeatedly                                                                                                                                    |
| <input checked="" type="checkbox"/> | <input type="checkbox"/>            | The statistical test(s) used AND whether they are one- or two-sided<br><i>Only common tests should be described solely by name; describe more complex techniques in the Methods section.</i>                                                               |
| <input checked="" type="checkbox"/> | <input type="checkbox"/>            | A description of all covariates tested                                                                                                                                                                                                                     |
| <input checked="" type="checkbox"/> | <input type="checkbox"/>            | A description of any assumptions or corrections, such as tests of normality and adjustment for multiple comparisons                                                                                                                                        |
| <input type="checkbox"/>            | <input checked="" type="checkbox"/> | A full description of the statistical parameters including central tendency (e.g. means) or other basic estimates (e.g. regression coefficient) AND variation (e.g. standard deviation) or associated estimates of uncertainty (e.g. confidence intervals) |
| <input checked="" type="checkbox"/> | <input type="checkbox"/>            | For null hypothesis testing, the test statistic (e.g. $F$ , $t$ , $r$ ) with confidence intervals, effect sizes, degrees of freedom and $P$ value noted<br><i>Give <math>P</math> values as exact values whenever suitable.</i>                            |
| <input checked="" type="checkbox"/> | <input type="checkbox"/>            | For Bayesian analysis, information on the choice of priors and Markov chain Monte Carlo settings                                                                                                                                                           |
| <input checked="" type="checkbox"/> | <input type="checkbox"/>            | For hierarchical and complex designs, identification of the appropriate level for tests and full reporting of outcomes                                                                                                                                     |
| <input checked="" type="checkbox"/> | <input type="checkbox"/>            | Estimates of effect sizes (e.g. Cohen's $d$ , Pearson's $r$ ), indicating how they were calculated                                                                                                                                                         |

*Our web collection on [statistics for biologists](#) contains articles on many of the points above.*

### Software and code

Policy information about [availability of computer code](#)

Data collection

SerialEM 3.8

Data analysis

RELION-3.1, MotionCor2, CTFfind4, Chimera, ChimeraX-1.1.1, Coot, Phenix, Molprobit, PyMol 2.4.2.

For manuscripts utilizing custom algorithms or software that are central to the research but not yet described in published literature, software must be made available to editors and reviewers. We strongly encourage code deposition in a community repository (e.g. GitHub). See the Nature Portfolio [guidelines for submitting code & software](#) for further information.

### Data

Policy information about [availability of data](#)

All manuscripts must include a [data availability statement](#). This statement should provide the following information, where applicable:

- Accession codes, unique identifiers, or web links for publicly available datasets
- A description of any restrictions on data availability
- For clinical datasets or third party data, please ensure that the statement adheres to our [policy](#)

We have provided a Data Availability Statement in the main text to include all required information.

## Life sciences study design

All studies must disclose on these points even when the disclosure is negative.

|                 |                                                                                                                                                                                                                                                                                                                                                                                                 |
|-----------------|-------------------------------------------------------------------------------------------------------------------------------------------------------------------------------------------------------------------------------------------------------------------------------------------------------------------------------------------------------------------------------------------------|
| Sample size     | For all signaling assays, we used data from 3 experiments because three biological replicates are the minimum for inferential analysis. For cryo-EM data collection, we collected 4045, 4579, 3162, and 3210 movies for fMLFII-FPR1-Gi, fMLFII-FPR2-Gi, CFEN-855A-FPR2-Gi, and C43-FPR2-Gi, respectively. Those movies are sufficient to allow us to obtain high resolution cryo-EM structures. |
| Data exclusions | For cryo-EM structure determination, we excluded movies that didn't have high-resolution information. The details are shown in Supplementary Figure 2c, d; 3c, d.                                                                                                                                                                                                                               |
| Replication     | For all signaling and binding assays, we used data from 3 repeated experiments. Not all attempts at replication were successful because of mistakes in sample preparation.                                                                                                                                                                                                                      |
| Randomization   | For each dataset (curves) in our signaling assays, cells were uniformly seeded in plates before treatment to ensure comparable backgrounds. For cryo-EM data collection on each protein complex, we prepared the protein complex sample in one tube and collected cryo-EM data using this sample. No sample allocation was performed.                                                           |
| Blinding        | The investigators were aware of how cells were treated before collecting data. Data were collected from seeded cells in multi-well plates in an automated manner. No biased results were introduced by the investigators.                                                                                                                                                                       |

## Reporting for specific materials, systems and methods

We require information from authors about some types of materials, experimental systems and methods used in many studies. Here, indicate whether each material, system or method listed is relevant to your study. If you are not sure if a list item applies to your research, read the appropriate section before selecting a response.

### Materials & experimental systems

| n/a                                 | Involved in the study                                     |
|-------------------------------------|-----------------------------------------------------------|
| <input type="checkbox"/>            | <input checked="" type="checkbox"/> Antibodies            |
| <input type="checkbox"/>            | <input checked="" type="checkbox"/> Eukaryotic cell lines |
| <input checked="" type="checkbox"/> | <input type="checkbox"/> Palaeontology and archaeology    |
| <input checked="" type="checkbox"/> | <input type="checkbox"/> Animals and other organisms      |
| <input checked="" type="checkbox"/> | <input type="checkbox"/> Human research participants      |
| <input checked="" type="checkbox"/> | <input type="checkbox"/> Clinical data                    |
| <input checked="" type="checkbox"/> | <input type="checkbox"/> Dual use research of concern     |

### Methods

| n/a                                 | Involved in the study                           |
|-------------------------------------|-------------------------------------------------|
| <input checked="" type="checkbox"/> | <input type="checkbox"/> ChIP-seq               |
| <input checked="" type="checkbox"/> | <input type="checkbox"/> Flow cytometry         |
| <input checked="" type="checkbox"/> | <input type="checkbox"/> MRI-based neuroimaging |

## Antibodies

|                 |                                                                                                                 |
|-----------------|-----------------------------------------------------------------------------------------------------------------|
| Antibodies used | Alexa Flour 647 labeled anti-FLAG M1 antibody                                                                   |
| Validation      | Western blot using FLAG-tagged proteins. Purification of FLAG-tagged receptors by M1 antibody-conjugated resin. |

## Eukaryotic cell lines

Policy information about [cell lines](#)

|                                                                   |                                                                                                                                                                                            |
|-------------------------------------------------------------------|--------------------------------------------------------------------------------------------------------------------------------------------------------------------------------------------|
| Cell line source(s)                                               | Sf9 Insect cells from ExpressionSystems ( <a href="https://expressionsystems.com/product/insect-cells/">https://expressionsystems.com/product/insect-cells/</a> ), HEK293 cells from ATCC. |
| Authentication                                                    | None of the cell lines used were authenticated.                                                                                                                                            |
| Mycoplasma contamination                                          | The cell lines were not tested for mycoplasma contamination                                                                                                                                |
| Commonly misidentified lines (See <a href="#">ICLAC</a> register) | None found in the ICLAC database.                                                                                                                                                          |
